# Supplementary material for: Facile strategy for intrinsic low-κ dielectric polymers: molecular design based on space charge conservation
Source: Royal Society of Chemistry journal article supplement (doi:10.1039/d3mh02034g), 2024-01-01
Supplement: d3mh02034g1.pdf [file d3mh02034g1.pdf]

*Supplementary Materials*

**Facile Strategy for Intrinsic Low- $\kappa$  Dielectric Polymers:  
Molecular Design Based on Space Charge Conservation**

Wei Ren <sup>a</sup>, Haoning Li <sup>a</sup>, Xiao Huang <sup>b</sup>, Xiujing Xing <sup>c</sup>, Guangming Yan <sup>a\*</sup>, Jie Yang

<sup>a, d</sup>, Gang Zhang <sup>a, d\*</sup>

<sup>a</sup> Institute of Materials Science & Technology, Analytical & Testing Center, Sichuan University, Chengdu 610064, P.R. China

<sup>b</sup> College of Polymer Science and Engineering, Sichuan University, Chengdu 610065, P.R. China

<sup>c</sup> Provivi, Inc. Santa Monica, CA, United States

<sup>d</sup> State Key Laboratory of Polymer Materials Engineering, Sichuan University, Chengdu 610065, P.R. China

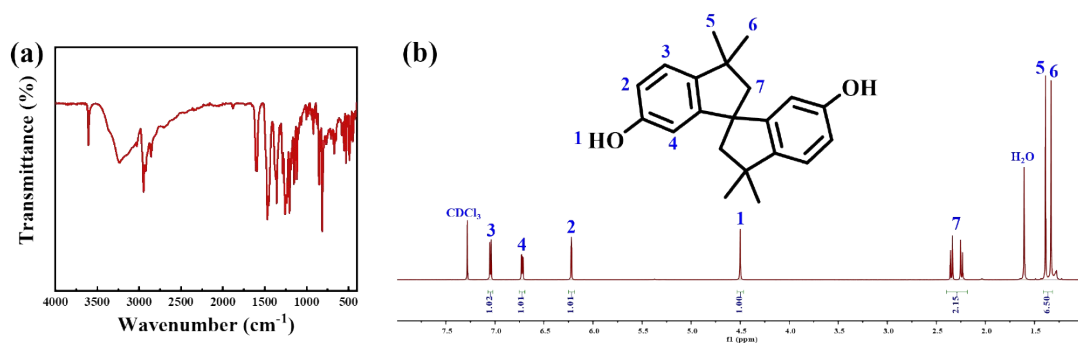

**Figure S1.** (a) FT-IR and (b) <sup>1</sup>H NMR of SBI monomer.

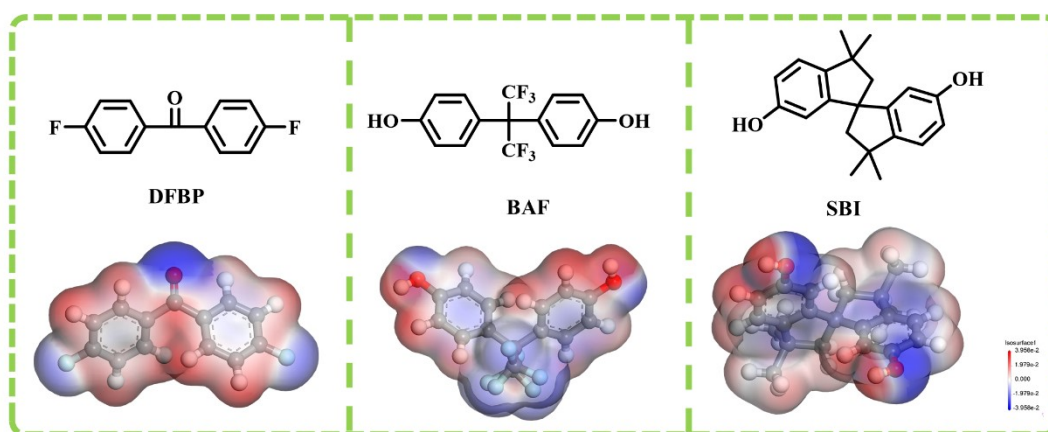

**Figure S2.** 3D electrostatic potential distribution of the DFDPM, BAF and SBI monomer.

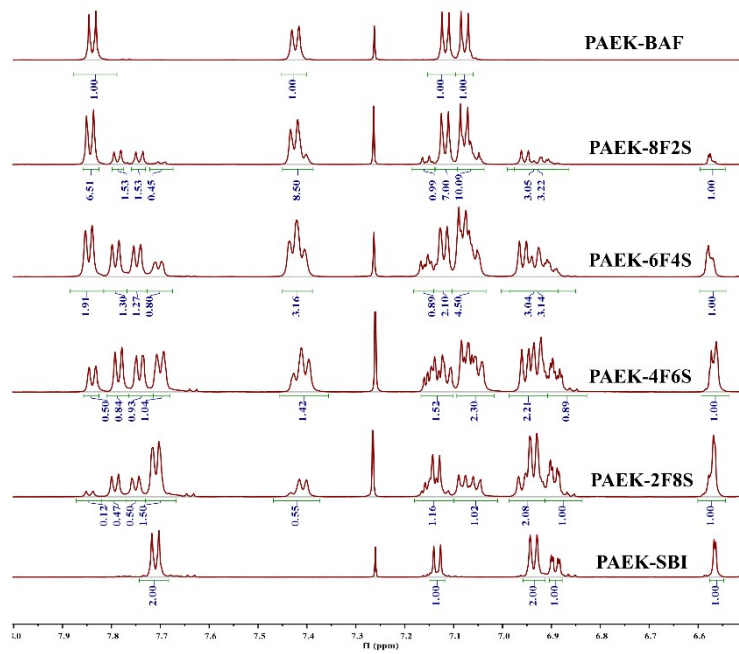

Figure S3. High resolution  $^1\text{H}$  NMR of PAEKs.

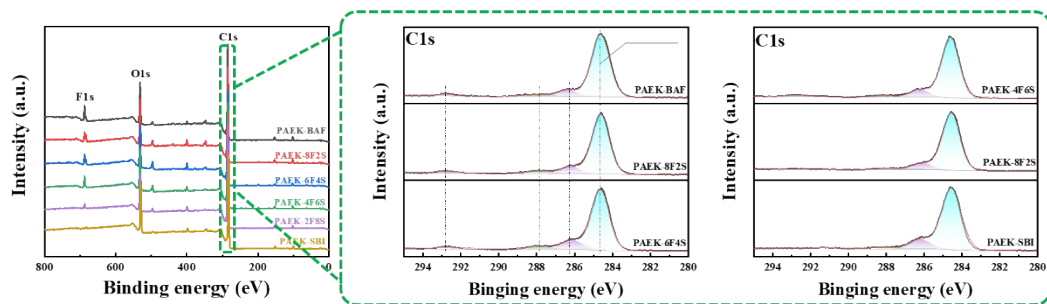

Figure S4. high-resolution XPS spectra of C1s of PAEKs.

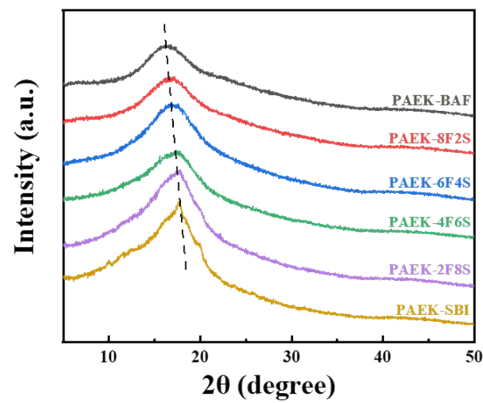

Figure S5. XRD patterns of the PAEKs powders.

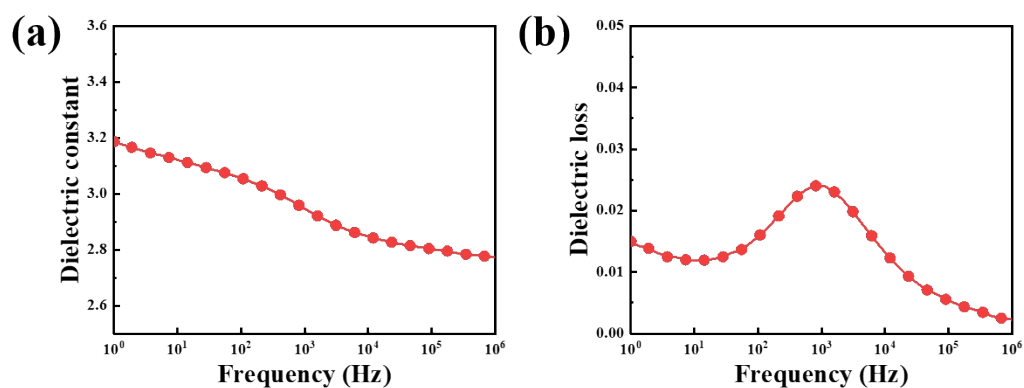

**Figure S6.** (a) Dielectric constant and (b) dielectric loss of commercial PEEK.

**Table S1.** The proportion of C, O and F in the PAEKs.

| PAEKs     | C content (%) | O content (%) | F content (%) |
|-----------|---------------|---------------|---------------|
| PAEK-BAF  | 80.37         | 14.63         | 5.01          |
| PAEK-8F2S | 80.15         | 15.39         | 4.45          |
| PAEK-6F4S | 80.41         | 15.42         | 4.18          |
| PAEK-4F6S | 82.98         | 13.45         | 3.57          |
| PAEK-2F8S | 84.69         | 13.27         | 2.04          |
| PAEK-SBI  | 81.2          | 17.99         | 0.81          |

**Table S2.** XRD peak angles of all samples and their corresponding interchain spacing.

| PAEKs     | Powders        |               | Annealed sheets |               |
|-----------|----------------|---------------|-----------------|---------------|
|           | 2 $\theta$ (°) | Distance (nm) | 2 $\theta$ (°)  | Distance (nm) |
| PAEK-BAF  | 16.15          | 0.5503        | 16.33           | 0.5424        |
| PAEK-8F2S | 16.62          | 0.5348        | 16.72           | 0.5298        |

|           |       |        |       |        |
|-----------|-------|--------|-------|--------|
| PAEK-6F4S | 16.80 | 0.5292 | 16.85 | 0.5278 |
| PAEK-4F6S | 17.22 | 0.5163 | 17.92 | 0.4946 |
| PAEK-2F8S | 17.57 | 0.5061 | 17.77 | 0.4987 |
| PAEK-SBI  | 17.62 | 0.5047 | 17.73 | 0.4999 |

**Table S3.** The comparison of dielectric properties of this work with literature reports.<sup>[1-10]</sup>

| Polymers           | Test frequency | Dielectric properties (room temperature) |              | Dielectric properties (high temperature) |              |       | Ref.      |
|--------------------|----------------|------------------------------------------|--------------|------------------------------------------|--------------|-------|-----------|
|                    |                | $\kappa$                                 | Tan $\delta$ | $\kappa$                                 | Tan $\delta$ | Temp. |           |
| PAEK-4F6S          | 1 MHz          | 1.98                                     | 0.0024       | 2.05                                     | 0.0053       | 150°C | This work |
| PAEK-4F6S          | 9 GHz          | 1.79                                     | 0.0054       | -                                        | -            | -     | This work |
| Fluoropolymer      | 30 MHz         | 2.33                                     | 0.0012       | -                                        | -            | -     | [1]       |
| Fluoropolymer      | 10 GHz         | 2.89                                     | 0.0061       | -                                        | -            | -     | [2]       |
| BCB-based polymer  | 30 MHz         | 2.77                                     | 0.007        | -                                        | -            | -     | [3]       |
| BCB-based polymer  | 1 MHz          | 2.72                                     | 0.0055       | -                                        | -            | -     | [4]       |
| EP                 | 1 MHz          | 3.23                                     | 0.018        | -                                        | -            | -     | [5]       |
| POSS-based polymer | 1 MHz          | 2.88                                     | 0.01         | -                                        | -            | -     | [6]       |
| LCP                | 10 GHz         | 2.9                                      | 0.0027       | -                                        | -            | -     | [7]       |
| Poly(aryl ether)   | 1 MHz          | -                                        | -            | 2.4                                      | 0.004        | 215°C | [8]       |
| PI                 | 10 KHz         | 2.09                                     | 0.0012       | -                                        | -            | -     | [9]       |
| MOF                | 1 MHz          | 3.05                                     | -            | 3.06                                     | -            | 350K  | [10]      |

## References

- [1] C. Yuan, K. Jin, K. Li, S. Diao, J. Tong, Q. Fang, *Adv. Mater.*, 2013, **25**, 4875.
- [2] Y. Feng, J. Sun, Q. Fang, *ACS Appl. Polym. Mater.*, 2023, **5**, 4419-4426
- [3] X. Chen, L. Fang, X. Chen, J. Zhou, J. Wang, J. Sun, Q. Fang, *ACS Sustainable Chem. Eng.*, 2018, **6**, 13518.
- [4] J. He, X. Wu, Y. Cheng, *Eur. Polym. J.*, 2023, **196**, 112334.
- [5] M. Wu, X. Liu, Y. Zhou, L. Fu, J. Pan, B. Cao, S. Liu, J. Zhao, W. Xie, *Chem. Eng. J.*, 2022, **437**, 135435.
- [6] Z. Zhang, Y. Zhou, L. Cai, L. Xuan, X. Wu, X. Ma, *Chem. Eng. J.*, 2022, **439**, 135740.
- [7] S.-Y. Zhang, T. Fu, Y. Gong, D.-M. Guo, X.-L. Wang, Y.-Z. Wang, *Chinese Chem. Lett.*, 2023, **34**, 107615.
- [8] Z. Wang, Y. Xie, Y. Shang, D. Xu, Z. Jiang, Q. Xu, C. Zhou, H. Zhang, *Macromol. Rapid Comm.*, 2020, **41**, e2000100.
- [9] C. Qian, R. Bei, T. Zhu, W. Zheng, S. Liu, Z. Chi, M. P. Aldred, X. Chen, Y. Zhang, J. Xu, *Macromolecules*, 2019, **52**, 4601.
- [10] S. Mendiratta, M. Usman, C.-C. Chang, Y.-C. Lee, J.-W. Chen, M.-K. Wu, Y.-C. Lin, C.-P. Hsu, K.-L. Lu, *J. Mater. Chem. C*, 2017, **5**, 1508.
